# Supplementary material for: Gene Expression Profiling of Mycosis Fungoides in Early and Tumor Stage—A Proof-of-Concept Study Using Laser Capture/Single Cell Microdissection and NanoString Analysis
Source: MDPI journal article supplement (doi:10.3390/cells10113190), 2021-11-16
Supplement: s1 [file s1]

| Patient No. | Specimen No. | Non-tumor or Tumor MF | NanoString/IHC /Both | Age | Gender | Sites (skin biopsy)   |
|-------------|--------------|-----------------------|----------------------|-----|--------|-----------------------|
| 1           | MF-1         | Non-tumor             | Both                 | 82  | M      | Right upper back      |
|             | MF-2         | Tumor                 | Both                 |     |        | Right posterior arm   |
|             | MF-3         | Tumor                 | Both                 |     |        | Left chest wall       |
| 2           | MF-4         | Non-tumor             | Both                 | 56  | M      | Right scapula         |
|             | MF-5         | Tumor                 | Both                 |     |        | Left scalp            |
| 3           | MF-6         | Tumor                 | Both                 | 44  | F      | Frontal scalp         |
| 4           | MF-7         | Non-tumor             | IHC                  | 59  | M      | Left medial chest     |
|             | MF-8         | Tumor                 | IHC                  |     |        | Left lateral chest    |
| 5           | MF-9         | Non-tumor             | IHC                  | 44  | F      | Left medial foot      |
|             | MF-10        | Non-tumor             | IHC                  |     |        | Right lower abdomen   |
| 6           | MF-11        | Non-tumor             | IHC                  | 76  | M      | Right posterior thigh |
| 7           | MF-12        | Non-tumor             | Nanostring           | 56  | F      | Right upper back      |
|             | MF-13        | Non-tumor             | Nanostring           |     |        | Left lower back       |
| 8           | MF-14        | Non-tumor             | Nanostring           | 42  | F      | Right flank           |
| 9           | MF-15        | Non-tumor             | Nanostring           | 55  | F      | Unknown               |

**Supplementary Table S1.** Characteristics of the patients used in the NanoString and/or immunohistochemical analysis. All multiple samples from the same patients (#1,2,4,5 and 7) were collected at the same time.

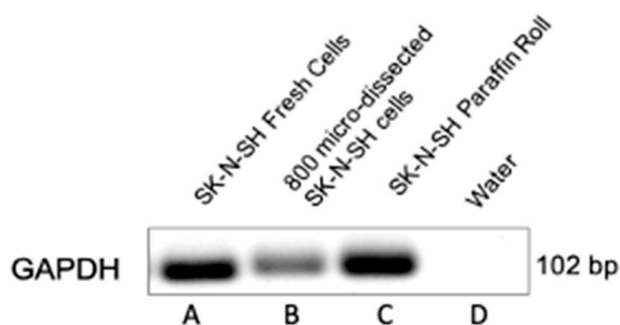

**Supplementary Figure S1.** RT-PCR was performed to detect *GAPDH*. Lane A was derived from RNA extracted from fresh SK-N-SH cells. Lane B was derived from RNA extracted from 800 single microdissected SK-N-SH cells from FFPE tissue sections. Lane C was derived RNA extracted from curls of a FFPE tissue block containing SK-N-SH. Lane D contained RNase-free water. Our results support that RNA from single-microdissected cells was relatively intact.
